# Supplementary material for: Citral Induced Apoptosis through Modulation of Key Genes Involved in Fatty Acid Biosynthesis in Human Prostate Cancer Cells: In Silico and In Vitro Study
Source: Hindawi journal article supplement (doi:10.1155/2020/6040727), 2020-01-01
Supplement: f1 [file 6040727.f1.pdf]

948

949

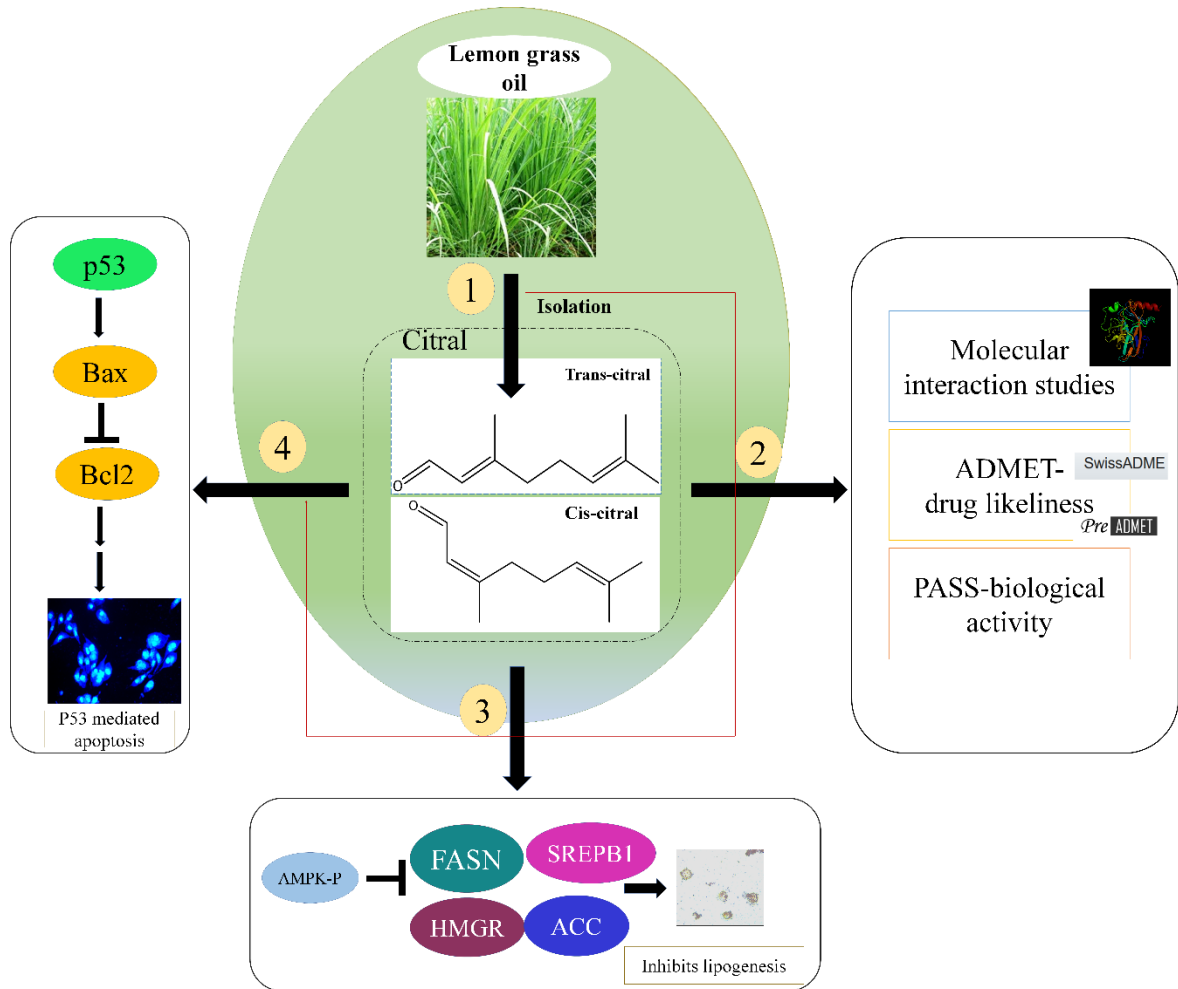

950

951

### Graphical abstract
